# Supplementary material for: Bifunctional defect mediated direct Z-scheme g-C3N4−x/Bi2O3−yheterostructures with enhanced piezo-photocatalytic properties for efficient tooth whitening and biofilm eradication
Source: Royal Society of Chemistry journal article supplement (doi:10.1039/d3tb01044a), 2023-01-01
Supplement: d3tb01044a1.pdf [file d3tb01044a1.pdf]

**Supporting Information for**

**Bifunctional defect mediated direct Z-scheme g-C<sub>3</sub>N<sub>4-x</sub>/Bi<sub>2</sub>O<sub>3-y</sub>  
heterostructures with enhanced piezo-photocatalytic properties for  
efficient tooth whitening and biofilms eradication**

Jiixin He<sup>a,b#</sup>, Shaoyu Cui<sup>a,b#</sup>, Yanfeng Hou<sup>a,b#</sup>, Shujuan Liu<sup>\*a,b</sup>, Zijian Zhang<sup>a,b</sup>, Mengjiao Zhao<sup>a,b</sup>, Liangcan He<sup>\*b,c</sup>, Ranxu Wang<sup>d</sup> and Shaoqin Liu<sup>\*b,c</sup>

<sup>a</sup> School of Materials Science and Engineering, Harbin Institute of Technology, Harbin 150001, P. R. China

<sup>b</sup> Key Laboratory of Micro-Systems and Micro-Structures Manufacturing, Ministry of Education, Harbin Institute of Technology, Harbin 150001, P. R. China

<sup>c</sup> The First Affiliated Hospital of Harbin Medical University, Harbin, 150001, China

<sup>d</sup> School of Medicine and Health, Harbin Institute of Technology, Harbin 150001, P. R. China

# These authors contributed equally to this work.

Email: liusj0817@hit.edu.cn, liangcanhe@hit.edu.cn, shaoqinliu@hit.edu.cn.

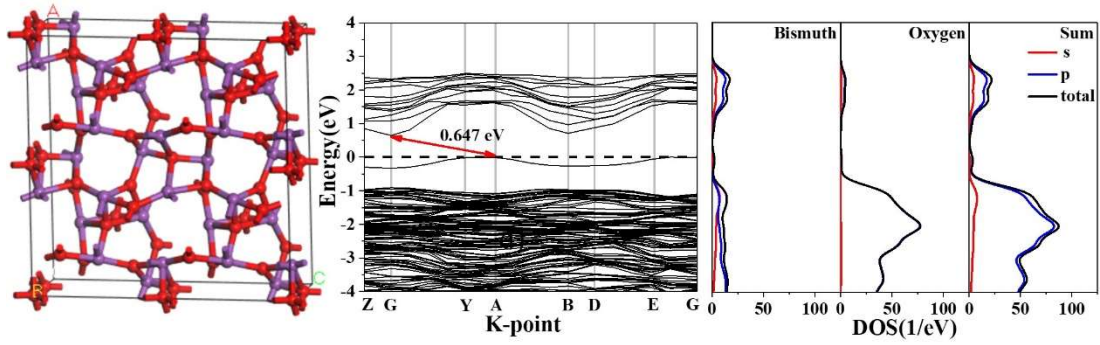

Fig. S1 Structure models, calculated band structures, corresponding DOS of  $\beta$ -Bi<sub>2</sub>O<sub>3- $\gamma$</sub>  (2 $\times$ 2 $\times$ 1) supercell.

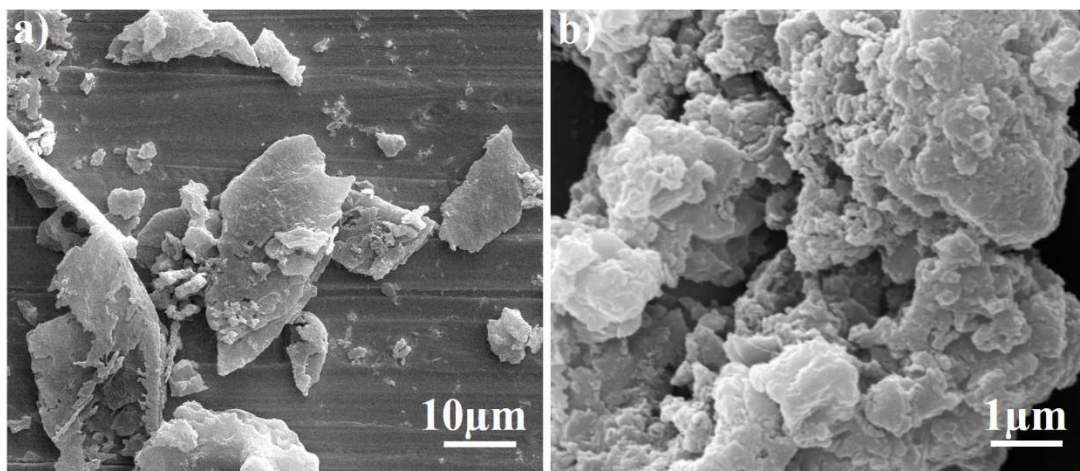

Fig. S2 FESEM images of samples. a) g-C<sub>3</sub>N<sub>4</sub> and b) N-deficient g-C<sub>3</sub>N<sub>4-x</sub>

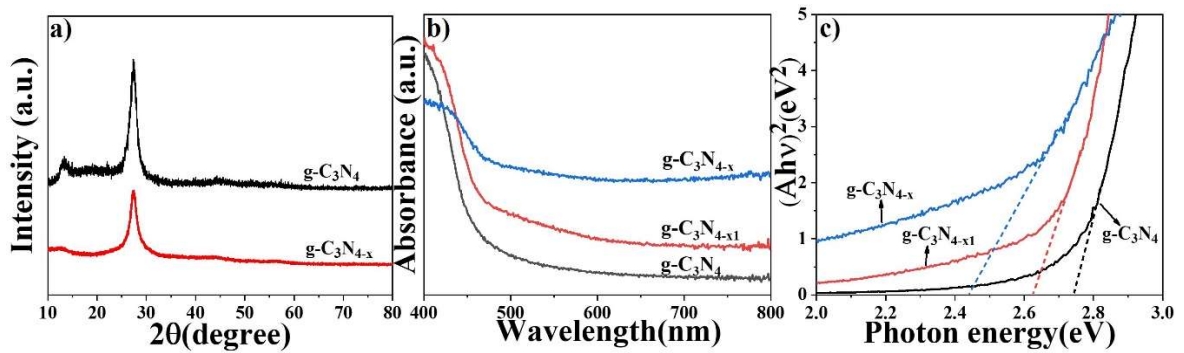

Fig. S3 a) XRD patterns, b) UV-Vis DRS spectra, c) Plots of transformed Kubelka-Munk function versus photon energy for g-C<sub>3</sub>N<sub>4</sub>, g-C<sub>3</sub>N<sub>4-x1</sub> and g-C<sub>3</sub>N<sub>4-x</sub>.

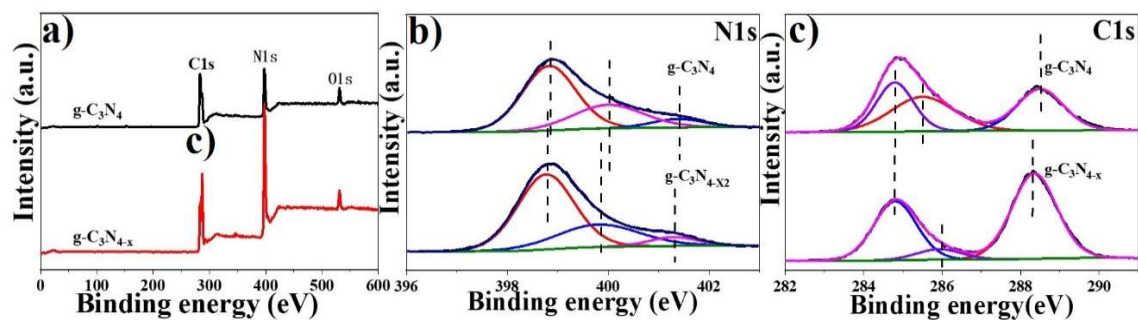

Fig. S4 XPS spectra of  $g\text{-C}_3\text{N}_4$  and N-deficient  $g\text{-C}_3\text{N}_{4-x}$  samples. a) Survey spectra; b) N1s; c) C1s.

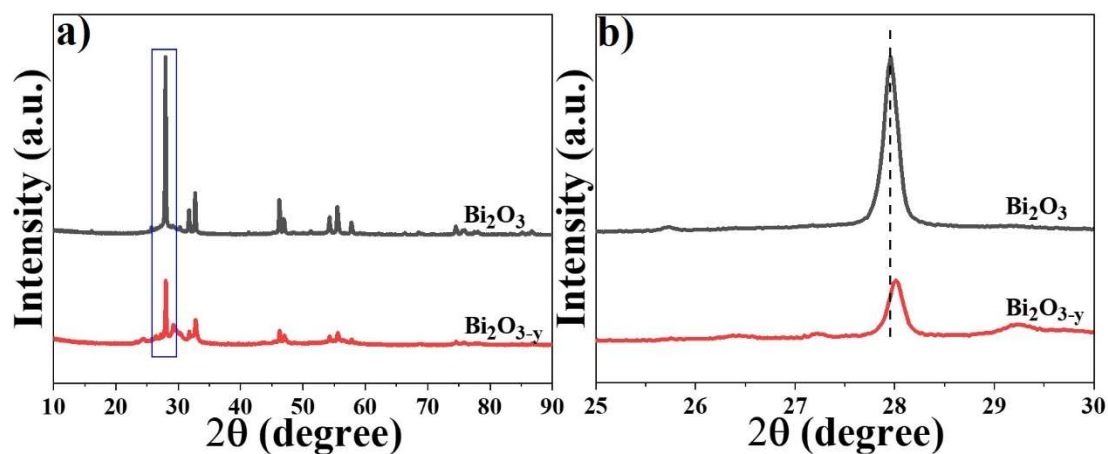

Fig. S5 a) XRD patterns of  $\text{Bi}_2\text{O}_3$  and  $\text{Bi}_2\text{O}_{3-y}$ ; b) The enlarged part of a).

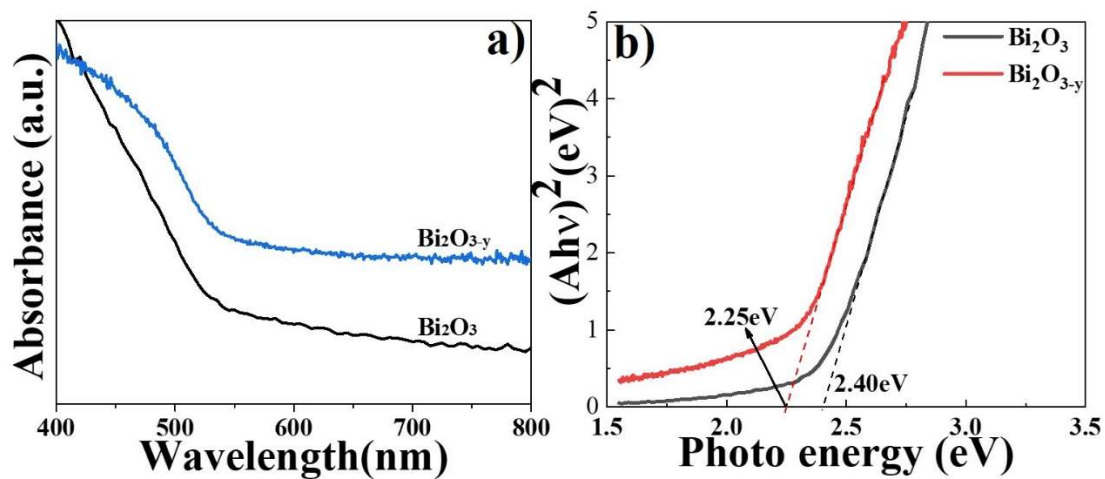

Fig. S6 UV-Vis DRS spectra a) and Plots of transformed Kubelka-Munk function versus photon energy b) for  $\text{Bi}_2\text{O}_3$  and  $\text{Bi}_2\text{O}_{3-y}$ .
